# Supplementary material for: Double-blind, randomized pilot clinical trial targeting alpha oscillations with transcranial alternating current stimulation (tACS) for the treatment of major depressive disorder (MDD)
Source: PubMed Central journal article supplement (PMC6401041; doi:10.1038/s41398-019-0439-0), 2019-03-05
Supplement: 41398_2019_439_MOESM6_ESM.pdf [file 41398_2019_439_MOESM6_ESM.pdf]

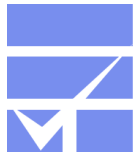

# CONSORT

TRANSPARENT REPORTING of TRIALS

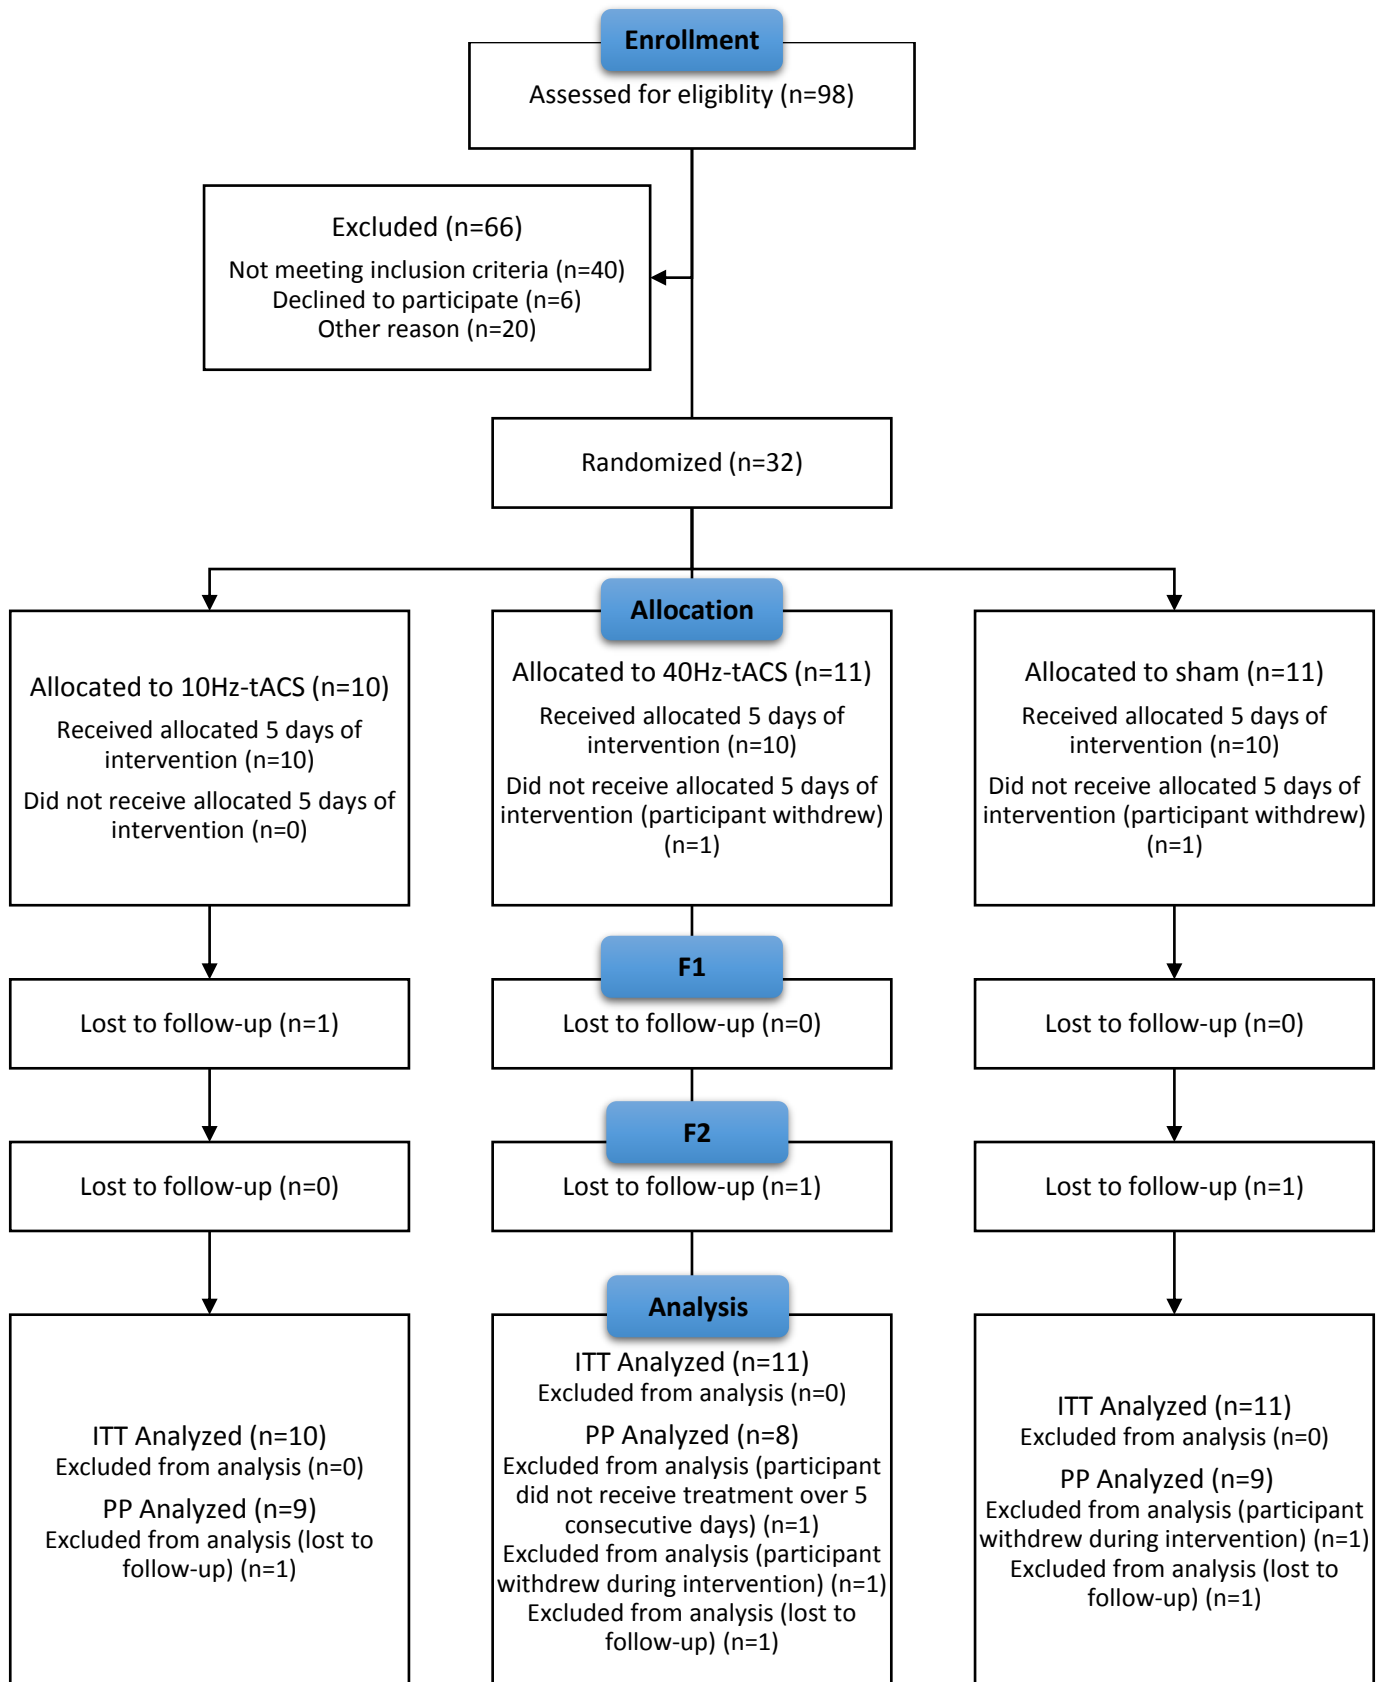

ITT = intent-to-treat  
PP = per protocol

F1 = follow-up 1, 2 weeks after intervention  
F2 = follow-up 2, 4 weeks after intervention
